# Supplementary material for: Relationship between trying an electronic cigarette and subsequent cigarette experimentation in Scottish adolescents: a cohort study
Source: PubMed Central journal article supplement — Tob Control. 2017 Jul 22;27(4):373–8. doi: 10.1136/tobaccocontrol-2017-053691 (PMC6047138; doi:10.1136/tobaccocontrol-2017-053691), 2017-07-22
Supplement: tobaccocontrol-2017-053691supp001.pdf [file tobaccocontrol-2017-053691supp001.pdf]

E-cigarette longitudinal paper- supplementary material

Sample characteristics

eTable 1 Baseline never smokers -Sample characteristics

| Variable                                                         |              | Valid cases<br>(%)  | Missing (%)       |
|------------------------------------------------------------------|--------------|---------------------|-------------------|
| Ever used e-cigarette 2015                                       | Yes          | 263/2800<br>(9.4%)  | 201/3001(6.7% )   |
| Susceptible to smoking<br>2015                                   | Yes          | 771/2927<br>(26.3%) | 74/3001 (2.5% )   |
| A family member smokes<br>(mother/father/sister/brother)<br>2015 | Yes          | 980/2992<br>(32.8%) | 9/3001 (0.3%)     |
| Number of friends who smoke<br>2015                              | Most of them | 22/2581<br>(0.9%)   | 420/3001 (14.0% ) |
|                                                                  | About half   | 17/2581<br>(0.7%)   | 420/3001 (14.0% ) |
|                                                                  | Some of them | 574/2581<br>(22.2%) | 420/3001 (14.0% ) |

|                             |                         |                      |                   |
|-----------------------------|-------------------------|----------------------|-------------------|
|                             | None                    | 1968/2581<br>(76.3%) | 420/3001 (14.0% ) |
| Sex                         | Female                  | 1477/2992<br>(49.4%) | 6/3001 (0.2%)     |
| Ethnic group                | Non-white               | 226/2991<br>(7.6% )  | 10/3001 (0.3% )   |
| Family Affluence Scale 2015 | Low                     | 965/3001<br>(32.2%)  | 0                 |
|                             | Medium                  | 1008/3001<br>(33.6%) | 0                 |
|                             | High                    | 1028/3001<br>(34.3%) | 0                 |
| School year group –         | year 1<br>mean 12.5 yrs | 682/3001<br>(22.7%)  | 0                 |
|                             | year 2<br>mean 13.5 yrs | 716/3001<br>(23.9%)  | 0                 |
|                             | year 3<br>mean 14.6 yrs | 557/3001<br>(18.6%)  | 0                 |

|          |                                                     |                     |   |
|----------|-----------------------------------------------------|---------------------|---|
|          | year 4<br>mean 15.5 yrs                             | 514/3001<br>(17.1%) | 0 |
|          | year 5<br>mean 16.5 yrs                             | 334/3001<br>(11.1%) | 0 |
|          | year 6<br>mean 17.5 yrs                             | 198/3001<br>(6.6%)  | 0 |
| School 1 | Urban/<br>medium low deprivation                    | 858/3001<br>(28.6%) | 0 |
| School 2 | Accessible small<br>town/medium, low<br>deprivation | 738/3001<br>(24.6%) | 0 |
| School3  | Other urban/<br>high deprivation                    | 672/3001<br>(22.4%) | 0 |
| School4  | Urban/ high deprivation                             | 733/3001<br>(24.5%) | 0 |

#### Information on loss to follow-up

In common with most longitudinal samples subject attrition differentially affected males, young people from lower socioeconomic groups and those with more smokers in their social circle. This probably means we underestimate the proportions of young people who initiate smoking during the follow up year. However, there is no difference in baseline e-cigarette status between those who were and were not lost to follow up. Therefore number of smoking initiators is probably underestimated in both groups.

eTable 2 Comparison of characteristic of cases in Model 2 (Table 3 main paper) versus those with missing data

|                                  | Missing group<br>(n=1195) | Analysed group<br>(n=1806) | Total never<br>smokers 2015<br>(n=3001) |
|----------------------------------|---------------------------|----------------------------|-----------------------------------------|
| Sex -male                        | 649<br>54.3%              | 867<br>48.0%               | 1479<br>49.3%                           |
| FAS-low                          | 415<br>34.7%              | 550<br>30.5%               | 965<br>32.2%                            |
| FAS-medium                       | 436<br>36.5%              | 572<br>31.6%               | 1008<br>33.6%                           |
| FAS-high                         | 344<br>28.8%              | 684<br>37.9%               | 1028<br>34.3%                           |
| White ethnic group               | 1072<br>89.6%             | 1690<br>93.8%              | 2762<br>92.1%                           |
| Ever e-cigarette use<br>2015-yes | 103<br>8.6%               | 160<br>8.9%                | 263<br>8.8%                             |
| Any family member<br>smoker      | 435<br>36.4%              | 545<br>30.2%               | 980<br>32.7%                            |
| At least one friend<br>smokes    | 246<br>20.6%              | 367<br>20.3%               | 613<br>20.4%                            |
| Susceptible to<br>smoking        | 313<br>26.2%              | 458<br>25.4%               | 771<br>25.7%                            |

### Imputation procedure

Data was assumed to be Missing at Random (MAR) (Rubin 1976). The data was tested for Missing Completely At Random (MCAR) by conducting multiple logistic regressions on the ‘missingness’ of each variable using all the other variables in the model. The proportion of significant results suggested that the hypothesis of MCAR should be rejected. ‘Missingness’ was in the dependent variable was associated with the observed variables ‘age’ and ‘low family affluence’ and therefore likely to be MAR.

All dependent and independent variables in the estimation models were included in the imputation model with the following auxiliary variables: mother in employment, father in employment, entitlement to free school meals, whether lives with both parents. One hundred imputed datasets were produced with a burn-in of 10. Trace plots were inspected to confirm stationarity of each chain by the end of the specified burn-in period.

eTable3

| Variable                                 | Model 1-adjusted main effects<br>model<br>n=1806 |                 |        | Model 1 fully imputed<br>n=3001 |                 |        |
|------------------------------------------|--------------------------------------------------|-----------------|--------|---------------------------------|-----------------|--------|
|                                          | OR                                               | CI              | p      | OR                              | CI              | p      |
| E-cigarette ever use<br>2015             | 2.42                                             | 1.63 to<br>3.60 | <0.001 | 2.38                            | 1.66 to<br>3.42 | <0.001 |
| Susceptibility to<br>smoking 2015        | 3.65                                             | 2.70 to<br>4.94 | <0.001 | 3.46                            | 2.63 to<br>4.55 | <0.001 |
| Any family member<br>smokes 2015         | 1.89                                             | 1.40 to<br>2.56 | <0.001 | 1.99                            | 1.53 to<br>2.59 | <0.001 |
| ‘At least some’<br>friends smoke<br>2015 | 1.33                                             | 0.93 to<br>1.82 | 0.151  | 1.31                            | 0.95 to<br>1.80 | 0.097  |
| Age centred                              | 1.12                                             | 1.01 to<br>1.25 | 0.032  | 1.09                            | 0.98 to<br>1.20 | 0.102  |
| Ethnic group-white                       | 1.11                                             | 0.63 to<br>1.98 | 0.715  | 1.01                            | 0.62 to<br>1.64 | 0.981  |
| Sex- female                              | 0.85                                             | 0.64 to<br>1.12 | 0.243  | 0.87                            | 0.68 to<br>1.11 | 0.266  |

|                               |      |                 |  |      |                 |       |
|-------------------------------|------|-----------------|--|------|-----------------|-------|
| Family affluence scale<br>low | 1    |                 |  | 1    |                 |       |
| medium                        | 1.56 | 1.09 to<br>2.25 |  | 1.50 | 1.10 to<br>2.04 | 0.010 |
| high                          | 1.40 | 0.96 to<br>2.05 |  | 1.51 | 1.08 to<br>2.12 | 0.017 |
| School 1                      |      |                 |  | 1.18 | 0.84 to<br>1.67 | 0.332 |
| 2                             |      |                 |  | 1    |                 |       |
| 3                             |      |                 |  | 1.28 | 0.90 to<br>1.81 | 0.177 |
| 4                             |      |                 |  | 1.71 | 1.18 to<br>2.47 | 0.004 |

For the models with interaction terms two methods of imputation were attempted- treating the interaction term as ‘just another variable’ and imputing ‘by’ the interaction terms. The ‘just another variable’ approach was unsuccessful due to convergence issues. The second method does not allow the data to be fully imputed. In the third model below we tested the effects of removing the imputed values of the dependent variable from the analysis. eTable 4 below shows the imputed model with interaction terms (column 1) and the same analysis with the missing values of the dependent variable excluded (column 2).

eTable 4

| Variable | Model 3 adjusted imputed<br>model with interaction<br>effects<br>n=2520 | Model 3 adjusted imputed<br>model with interaction<br>effects missing dependent<br>variable excluded |
|----------|-------------------------------------------------------------------------|------------------------------------------------------------------------------------------------------|
|          |                                                                         |                                                                                                      |

|                                                 |      |               |        | n=1894 |               |        |
|-------------------------------------------------|------|---------------|--------|--------|---------------|--------|
|                                                 | OR   | CI            | p      | OR     | CI            | p      |
| E-cigarette ever use 2015                       | 6.64 | 3.60 to 12.26 | <0.001 | 6.06   | 3.16 to 11.64 | <0.001 |
| Susceptibility to smoking 2015                  | 5.19 | 3.74 to 7.21  | <0.001 | 4.13   | 2.99 to 5.71  | <0.001 |
| Any family member smokes 2015                   | 1.83 | 1.37 to 2.44  | <0.001 | 1.81   | 1.34 to 2.43  | <0.001 |
| 'At least some' friends smoke 2015              | 1.51 | 1.07 to 2.14  | 0.020  | 1.53   | 1.06 to 2.20  | 0.022  |
| Interaction between e-cig and any friends smoke | 0.52 | 0.25 to 1.09  | 0.082  | 0.49   | 0.23 to 1.07  | 0.075  |
| Interaction between e-cig and susceptibility    | 0.42 | 0.20 to 0.88  | 0.021  | 0.43   | 0.19 to 0.97  | 0.041  |

\*Adjusted for age, sex, family affluence scale, school and ethnic group.

The table below (eTable 5) shows the difference between the fully imputed model with no interaction terms (column 2) and the fully imputed model with no interaction terms and the missing values of the dependent variable excluded.

eTable 5

| Variable                                 | Model 1-with imputed<br>dependent variable cases<br>dropped<br>n=2271 |                 |        | Model 1 fully imputed<br>n=3001 |                 |        |
|------------------------------------------|-----------------------------------------------------------------------|-----------------|--------|---------------------------------|-----------------|--------|
|                                          | OR                                                                    | CI              | p      | OR                              | CI              | p      |
| E-cigarette ever use<br>2015             | 2.37                                                                  | 1.64 to<br>3.43 | <0.001 | 2.38                            | 1.66 to<br>3.42 | <0.001 |
| Susceptibility to<br>smoking 2015        | 3.50                                                                  | 2.67 to<br>4.59 | <0.001 | 3.46                            | 2.63 to<br>4.55 | <0.001 |
| Any family member<br>smokes 2015         | 2.02                                                                  | 1.55 to<br>2.64 | <0.001 | 1.99                            | 1.53 to<br>2.59 | <0.001 |
| ‘At least some’<br>friends smoke<br>2015 | 1.32                                                                  | 0.96 to<br>1.83 | 0.092  | 1.31                            | 0.95 to<br>1.80 | 0.097  |
| Age centred                              | 1.10                                                                  | 1.00 to<br>1.21 | 0.032  | 1.09                            | 0.98 to<br>1.20 | 0.102  |
| Ethnic group-white                       | 0.98                                                                  | 0.60 to<br>1.61 | 0.932  | 1.01                            | 0.62 to<br>1.64 | 0.981  |
| Sex- female                              | 0.87                                                                  | 0.68 to<br>1.12 | 0.243  | 0.87                            | 0.68 to<br>1.11 | 0.266  |
| Family affluence scale<br>low            | 1                                                                     |                 |        | 1                               |                 |        |
| medium                                   | 1.63                                                                  | 1.19 to<br>2.24 | 0.003  | 1.50                            | 1.10 to<br>2.04 | 0.010  |

|          |      |                 |       |      |                 |       |
|----------|------|-----------------|-------|------|-----------------|-------|
| high     | 1.56 | 1.12 to<br>2.19 | 0.009 | 1.51 | 1.08 to<br>2.12 | 0.017 |
| School 1 | 1.31 | 0.91 to<br>1.87 | 0.145 | 1.18 | 0.84 to<br>1.67 | 0.332 |
| 2        | 1    |                 |       | 1    |                 |       |
| 3        | 1.34 | 0.93 to<br>1.93 | 0.120 | 1.28 | 0.90 to<br>1.81 | 0.177 |
| 4        | 1.90 | 1.30 to<br>2.77 | 0.001 | 1.71 | 1.18 to<br>2.47 | 0.004 |

Effect of wide age range

We tested whether the wide age range employed in this study affected the results. The sample was split at age 14 and the models re-run (eTable 6).

eTable 6

| Logistic regression                | Under 14s           |        |      |        | 14 and over         |        |      |        |
|------------------------------------|---------------------|--------|------|--------|---------------------|--------|------|--------|
|                                    | Number of obs = 920 |        |      |        | Number of obs = 882 |        |      |        |
| Ever smoked 2016                   | OR                  | 95% CI | p    |        | OR                  | 95% CI | p    |        |
| E-cigarette ever use 2015          | 3.46                | 1.80   | 6.68 | <0.001 | 2.32                | 1.40   | 3.87 | 0.001  |
| Susceptibility to smoking 2015     | 4.00                | 2.44   | 6.55 | <0.001 | 3.28                | 2.21   | 4.87 | <0.001 |
| Any family member smokes 2015      | 1.91                | 1.20   | 3.03 | 0.006  | 1.7                 | 1.12   | 2.56 | 0.012  |
| 'At least some' friends smoke 2015 | 1.40                | 0.79   | 2.50 | 0.25   | 1.36                | 0.90   | 2.07 | 0.143  |
| Age centred                        | 0.90                | 0.61   | 1.31 | 0.574  | 1.27                | 1.01   | 1.60 | 0.039  |
| Ethnic group -other                | 1.27                | 0.56   | 2.89 | 0.562  | 1                   | 0.44   | 2.27 | 0.995  |
| Sex- female                        | 1.46                | 0.93   | 2.27 | 0.098  | 1.01                | 0.70   | 1.47 | 0.954  |
| Family affluence scale- low        | 1                   |        |      |        |                     |        |      |        |
| medium                             | 1.33                | 0.79   | 2.25 | 0.286  | 1.83                | 1.09   | 3.06 | 0.022  |
| high                               | 1.10                | 0.62   | 1.95 | 0.745  | 1.65                | 0.98   | 2.77 | 0.058  |
| School 1                           | 0.72                | 0.34   | 1.50 | 0.376  | 1.76                | 1.09   | 2.86 | 0.022  |
| 2                                  | 1                   |        |      |        |                     |        |      |        |
| 3                                  | 1.69                | 0.89   | 3.23 | 0.11   | 0.94                | 0.54   | 1.64 | 0.828  |
| 4                                  | 2.15                | 1.12   | 4.12 | 0.022  | 1.21                | 0.66   | 2.21 | 0.533  |
